# Supplementary material for: Unbiased Prediction and Feature Selection in High-Dimensional Survival Regression
Source: PubMed Central journal article supplement (PMC4827277; doi:10.1089/cmb.2015.0192), 2016-04-01
Supplement: Supp_Fig1.pdf [file Supp_Fig1.pdf]

# Supplementary Data

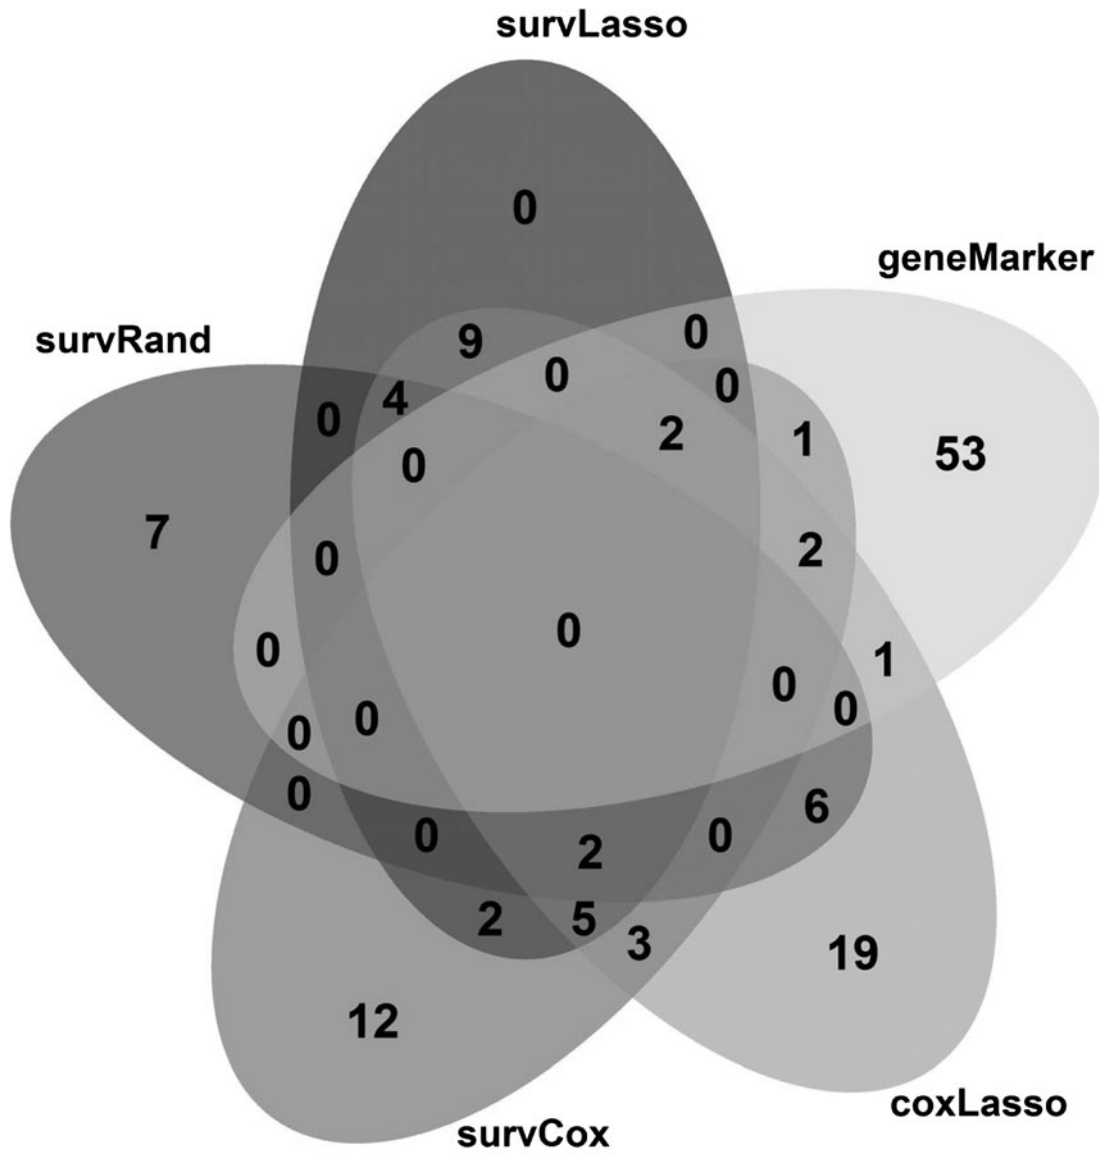

SUPPLEMENTARY FIG. S1. Overlap of the selected genes for all comparisons.
